# Supplementary material for: Population genomics and geographic dispersal in Chagas disease vectors: Landscape drivers and evidence of possible adaptation to the domestic setting
Source: PLOS journal article supplement (doi:10.1371/journal.pgen.1010019), 2022-02-04
Supplement: S11 (10.1371/journal.pgen.1010019.s011) [file journal.pgen.1010019.s011]

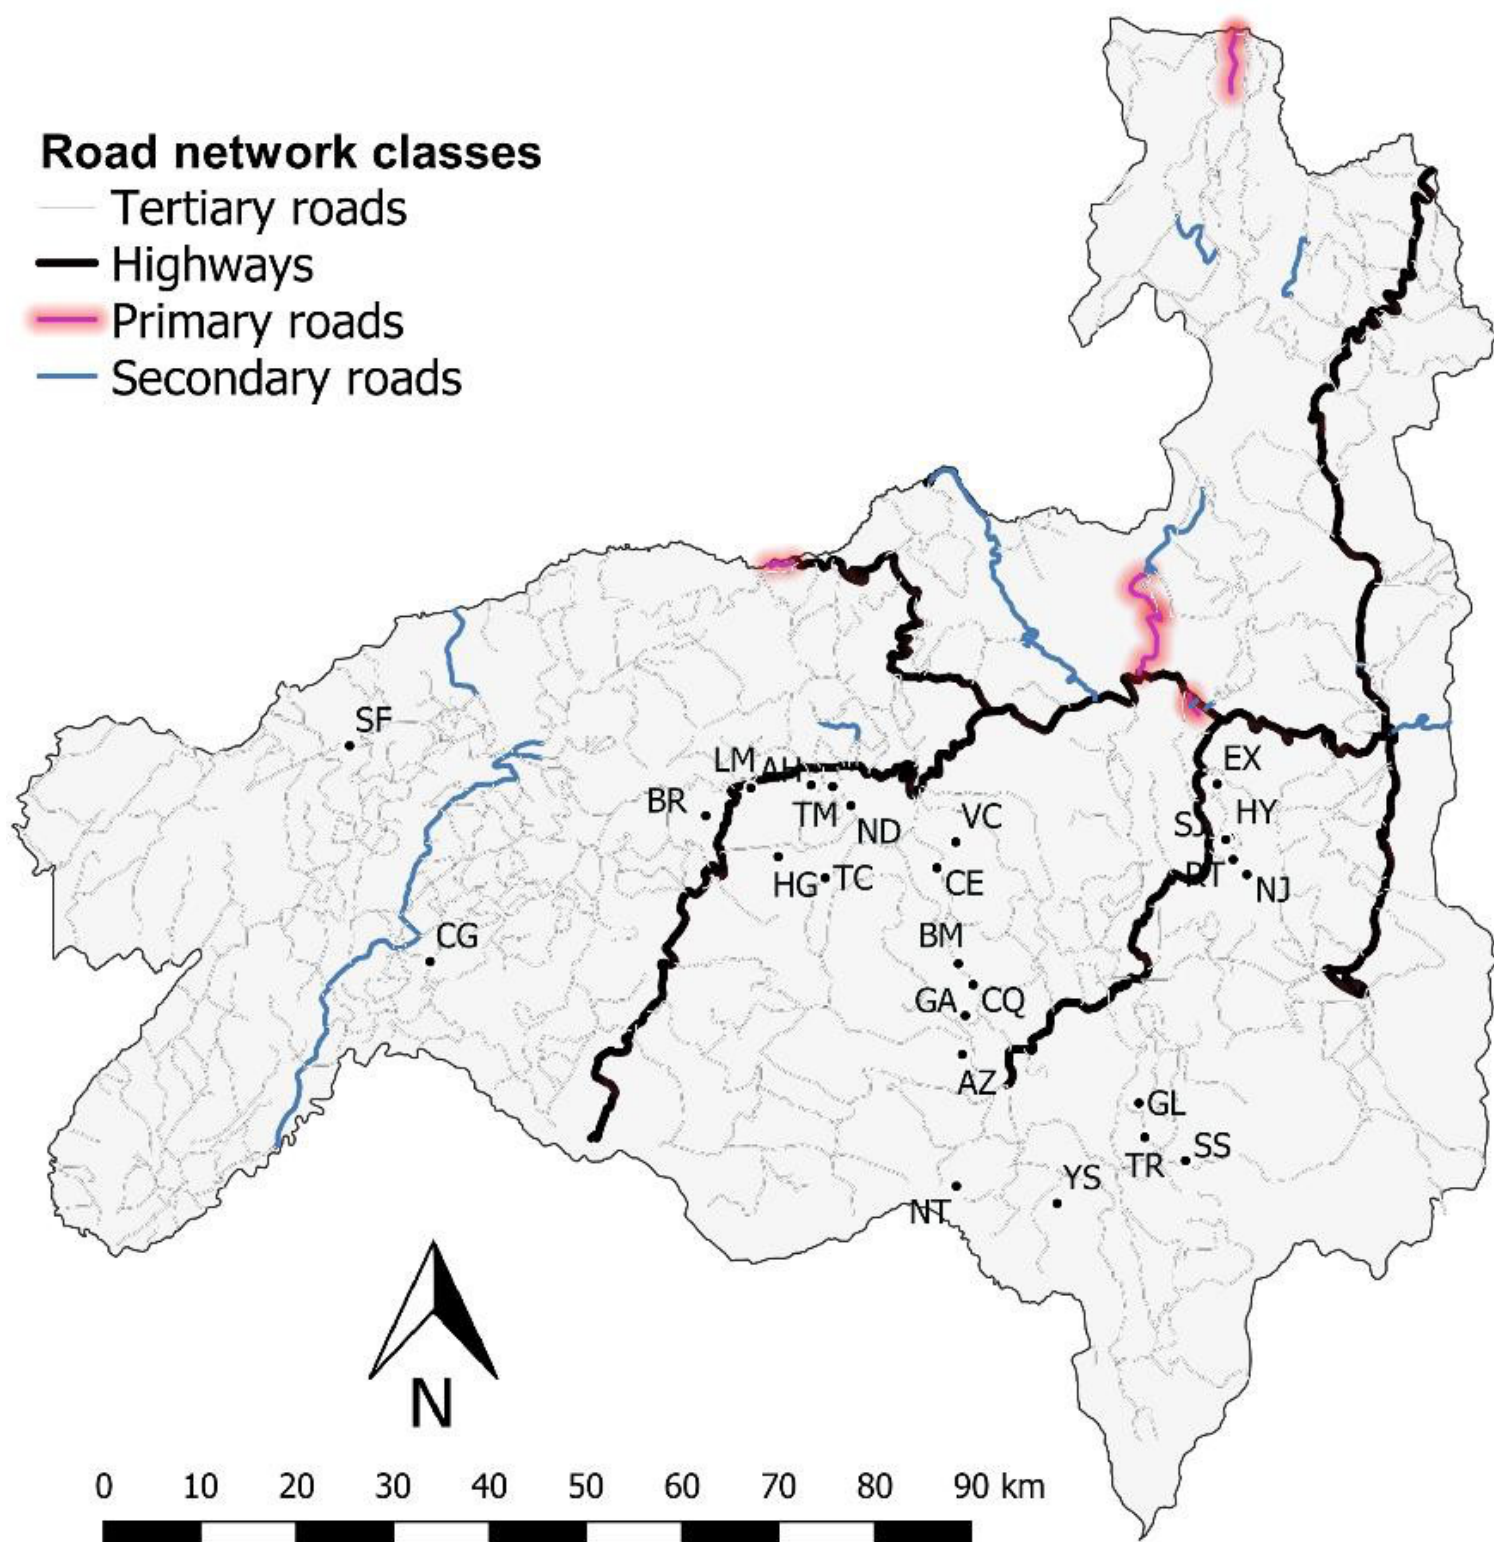

**S7 Fig. Map of the road network of Loja, Ecuador.** Dots show the location of the 25 sampled communities in Loja. Road categories are colour-coded to represent tertiary (grey thin line), highways (bold black line), primary (highlighted red) and secondary (light blue thin line) roads. Source map: [dataportal.pbl.nl/downloads/GRIP4/GRIP4\\_Region2\\_vector\\_shp.zip](https://dataportal.pbl.nl/downloads/GRIP4/GRIP4_Region2_vector_shp.zip)
