# Supplementary material for: Population genomics and geographic dispersal in Chagas disease vectors: Landscape drivers and evidence of possible adaptation to the domestic setting
Source: PLOS journal article supplement (doi:10.1371/journal.pgen.1010019), 2022-02-04
Supplement: S18 (10.1371/journal.pgen.1010019.s018) [file journal.pgen.1010019.s018]

**S6 Table. Spearman correlation test, rho, between raster surfaces previous to optimization with ResistanceGA.**

| Surface 1 | Surface 2  | Spearman's rho |
|-----------|------------|----------------|
| Relief    | Land cover | -0.1315174     |
| Relief    | Roads      | 0.01405202     |
| Roads     | Land cover | 0.03044303     |
